# Supplementary material
Source: ML conference proceedings conference paper supplement (https://openreview.net/forum?id=BPK2OaKVdy)
Supplement: supplementary_material [file attachment]

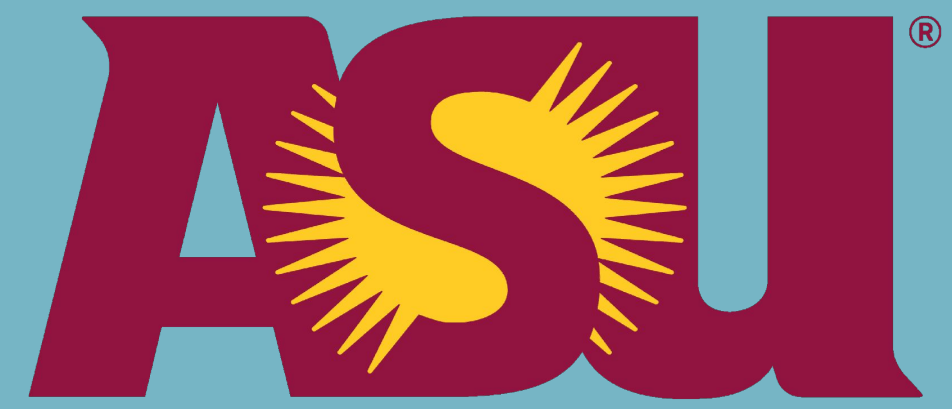

# Continual Robot Skill and Task Learning via Dialogue

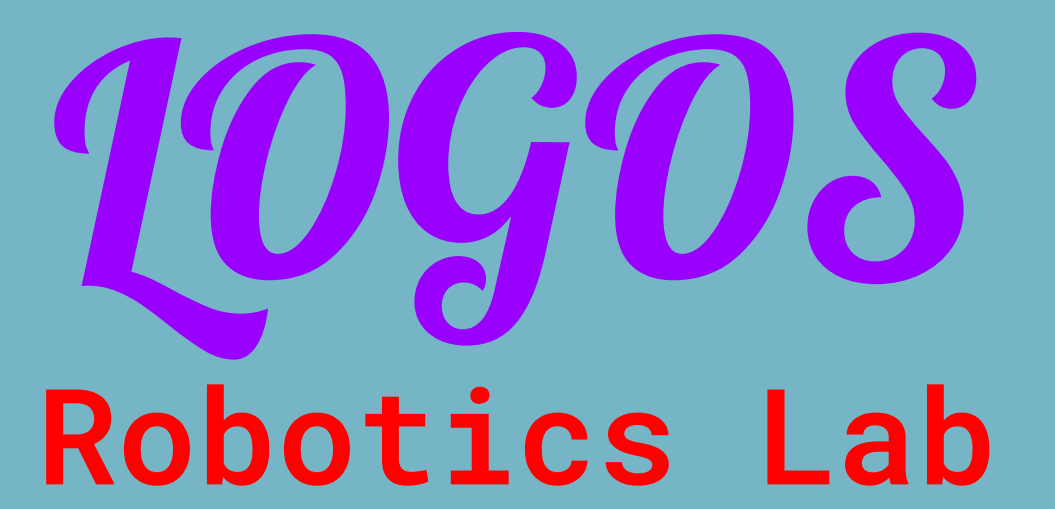

Weiwei Gu, Suresh Kondepudi, Anmol Gupta, Lixiao Huang, and Nakul Gopalan

## Motivation

The capability of dialog is desirable for robots as it allows robots to ask for help in a way that non-expert users can understand. Furthermore, robots need to leverage the feedback from users and learn to perform the task.

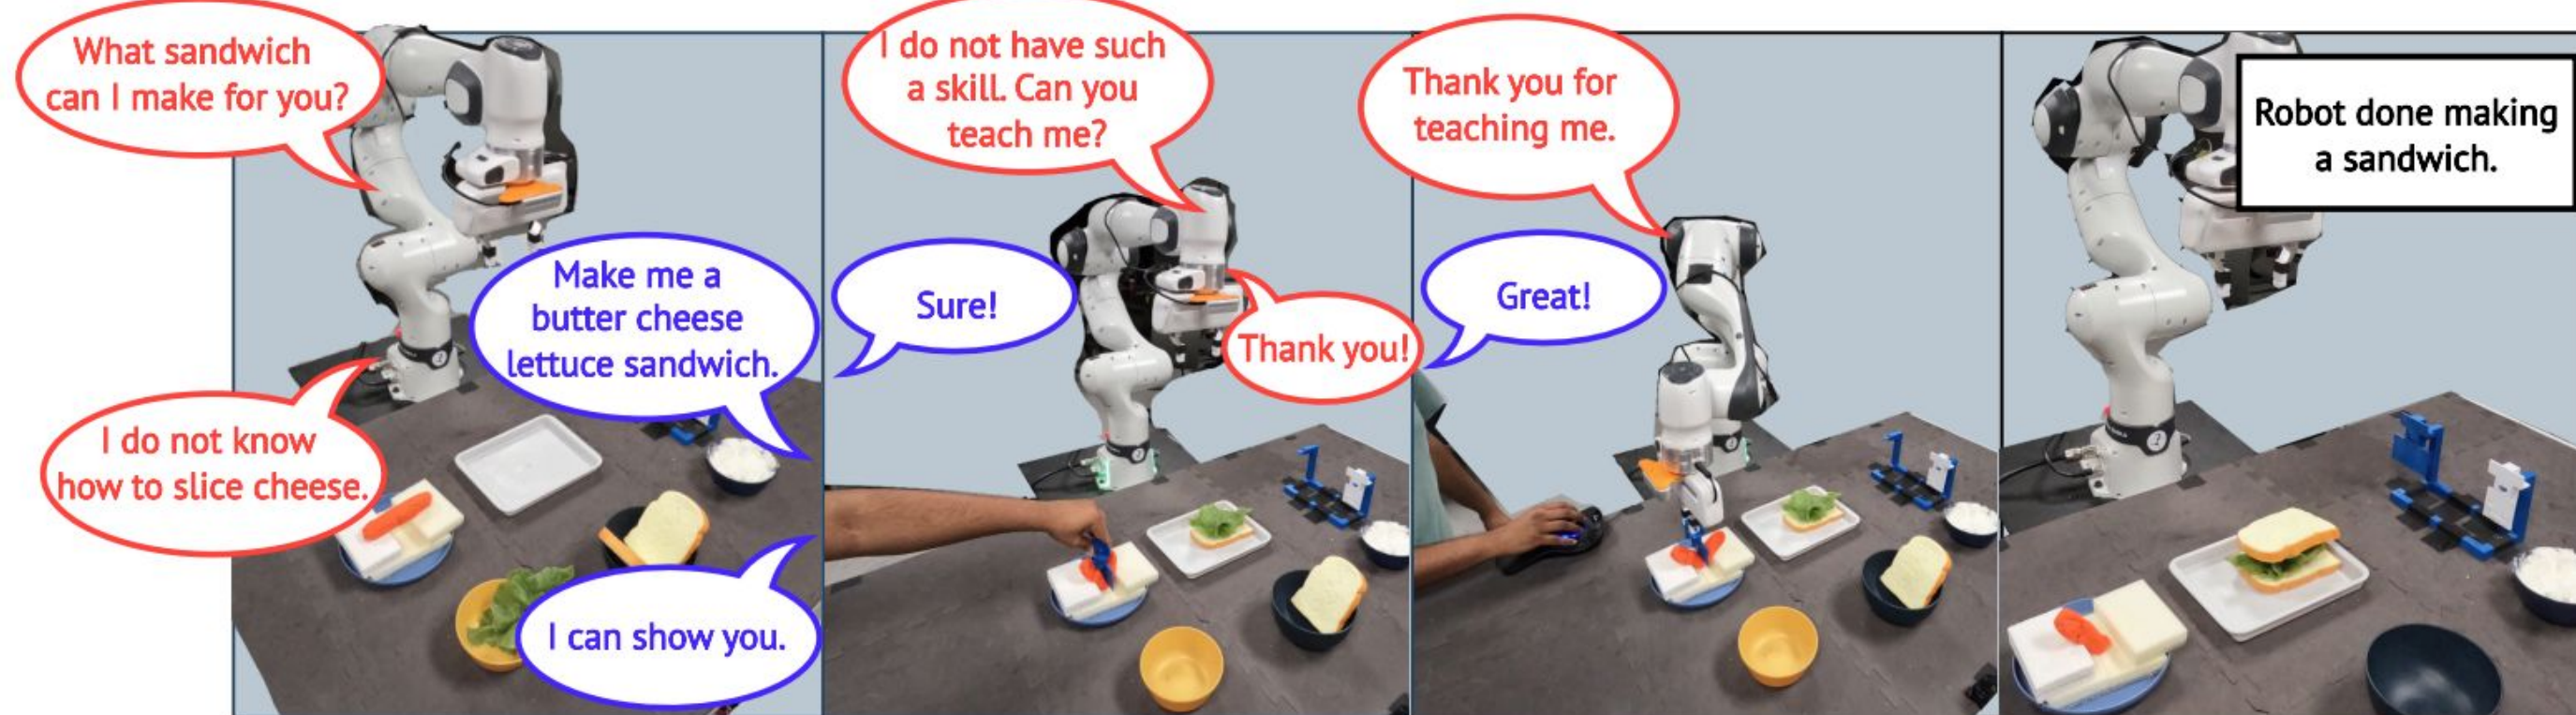

## ACT-LoRA

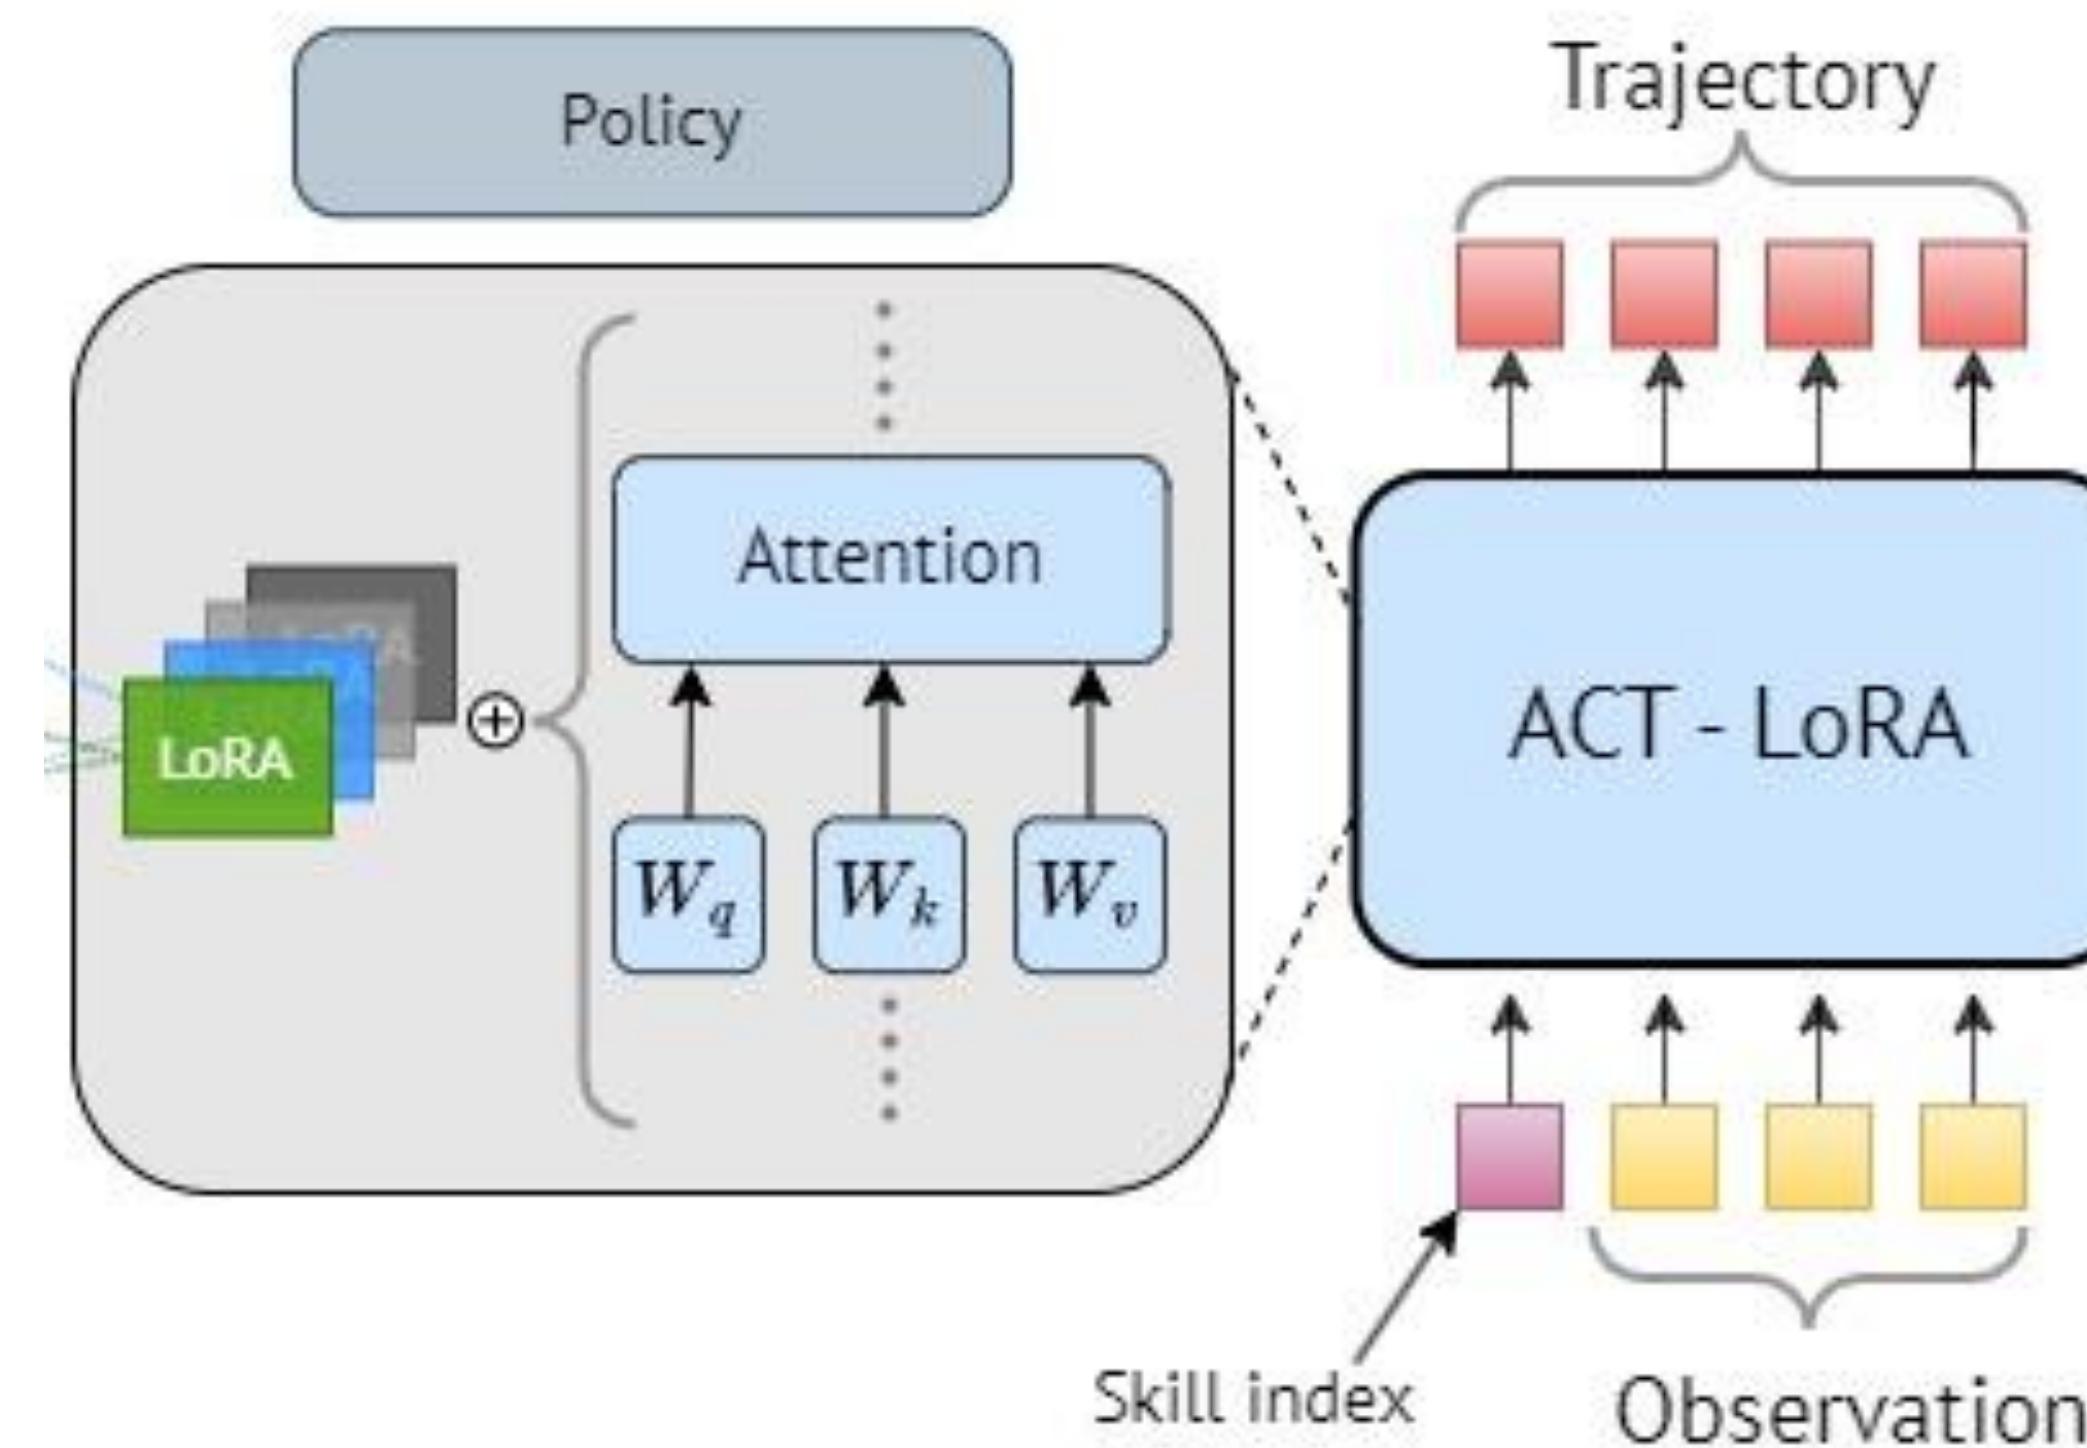

## Human Subject Study Results

Objective metrics on agent task performance:

| Agent             | Phase 1       |               | Phase 2       |                |               |
|-------------------|---------------|---------------|---------------|----------------|---------------|
|                   | Sandwich SR   | Pre-train SR  | Sandwich SR   | Few-shot SR    | Pre-train SR  |
| COLADA            | 93.75%(15/16) | 97.92%(47/48) | 81.25%(13/16) | 100.00%(16/16) | 91.67%(44/48) |
| Inverse Semantics | 81.25%(13/16) | 93.75%(45/48) | 87.50%(14/16) | N/A            | 91.67%(44/48) |
| Inarticulate      | 0.00%(0/16)   | 93.75%(15/16) | 0.00%(0/16)   | 0.00%(0/16)    | 87.50%(14/16) |

Objective metrics on distraction tasks:

| Agent             | Interruption Count | Normalized Completed Email Count | Normalized Word Count | Total Time      | Task Time       |
|-------------------|--------------------|----------------------------------|-----------------------|-----------------|-----------------|
| Phase One         |                    |                                  |                       |                 |                 |
| COLADA            | 2.13 ± 0.13        | 0.27 ± 0.03                      | 0.24 ± 0.01           | 2176.67 ± 57.06 | 1035.21 ± 26.10 |
| Inverse Semantics | 1.13 ± 0.09        | 0.16 ± 0.02                      | 0.20 ± 0.01           | 943.93 ± 32.41  | 753.21 ± 25.85  |
| Inarticulate      | 0.00 ± 0.00        | 0.07 ± 0.02                      | 0.08 ± 0.01           | 493.01 ± 58.62  | 412.98 ± 56.69  |
| Phase Two         |                    |                                  |                       |                 |                 |
| COLADA            | 0.00 ± 0.00        | 0.25 ± 0.03                      | 0.23 ± 0.02           | 1083.42 ± 27.28 | 1033.70 ± 26.32 |
| Inverse Semantics | 1.00 ± 0.00        | 0.17 ± 0.02                      | 0.17 ± 0.01           | 870.77 ± 26.26  | 738.27 ± 24.02  |
| Inarticulate      | 0.00 ± 0.00        | 0.08 ± 0.01                      | 0.07 ± 0.01           | 426.94 ± 51.85  | 376.78 ± 48.74  |

## Related Work

- Human-robot dialog. [1]
- Continual skill learning. [2]
- Active Learning. [3]

## Challenges

- How does the robot know that it does not know the skill to perform a task?
- How to continually learn novel skills without forgetting the existing ones, with only few instances?

## Methods

- Use language embedding spaces to estimate whether the robot possesses the skill or not.
- Introduce LoRA adapters to ACT to continually learn fine-grained control tasks
- Combine a state machine with LLM to request information via dialog

## COLADA Agent

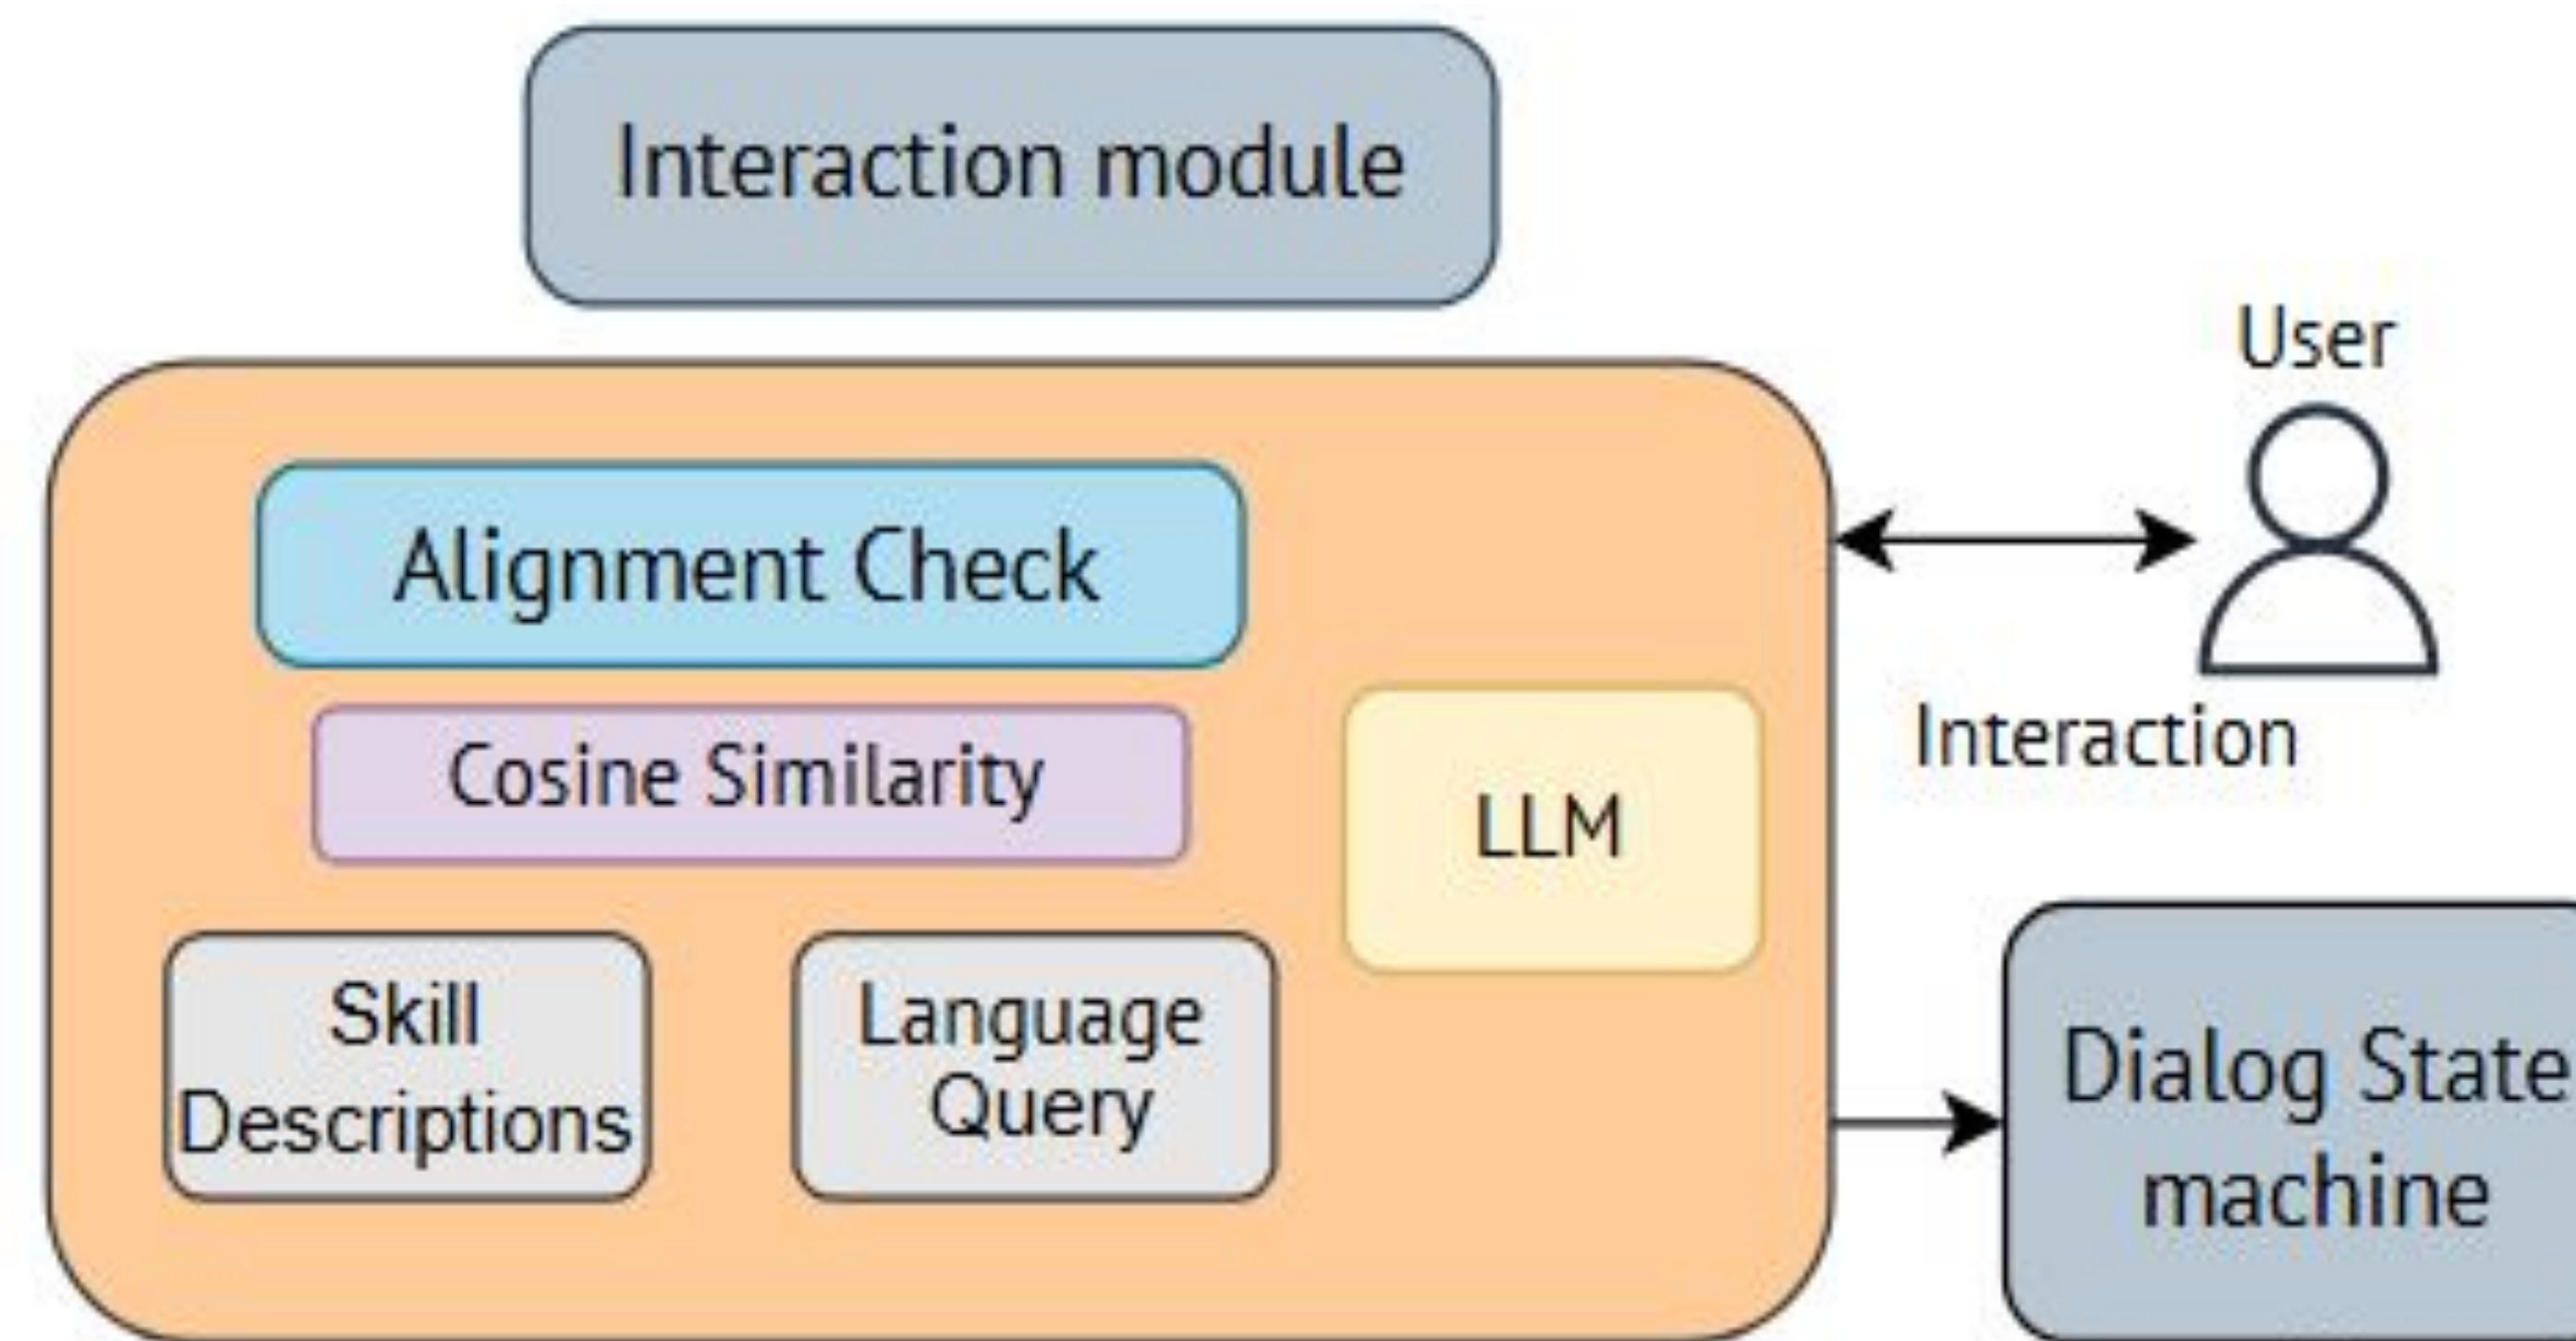

## Limitations

- Restricted domain for the human subject study.
- Demographic limitation of participants of the human subject study.
- Doesn't handle turn-taking naturally.
- Have issues with heterogeneous demonstrations

## Simulation Results

Results on RL Bench:

| Model    | Pre-trained Skills(1000 traj.) | Fine-tune Skills(1000 traj.) | Overall Success Rate(1000 traj.) | Fine-tune Skills(5 traj.) | Overall Success Rate(5 traj.) |
|----------|--------------------------------|------------------------------|----------------------------------|---------------------------|-------------------------------|
| ACT-LoRA | <b>60.75 ± 2.40</b>            | 54.00 ± 9.73*                | <b>59.40 ± 1.52</b>              | 77.67 ± 9.36              | <b>64.13 ± 1.80</b>           |
| GMM-LoRA | 26.08 ± 4.02                   | 13.33 ± 4.50                 | 23.53 ± 2.99                     | 16.67 ± 4.92              | 24.20 ± 3.72                  |
| ACT      | 9.25 ± 2.51                    | 62.00 ± 8.84*                | 19.80 ± 1.69                     | <b>95.00 ± 4.22</b>       | 26.40 ± 2.45                  |

Results on LIBERO:

| Model          | Pre-trained Skills(50 traj.) | Fine-tune Skills(50 traj.) | Overall Success Rate(50 traj.) | Fine-tune Skills(5 traj.) | Overall Success Rate(5 traj.) |
|----------------|------------------------------|----------------------------|--------------------------------|---------------------------|-------------------------------|
| LIBERO-Spatial |                              |                            |                                |                           |                               |
| ACT-LoRA       | 65.38 ± 4.51*                | 40.50 ± 6.09               | <b>60.40 ± 4.20</b>            | 35.50 ± 8.27              | 59.40 ± 4.40*                 |
| GMM-LoRA       | 64.75 ± 2.49*                | 9.00 ± 5.16                | 53.60 ± 1.70                   | 6.00 ± 2.92               | 53.0 ± 2.21*                  |
| ACT            | 0.03 ± 0.02                  | <b>68.50 ± 6.50</b>        | 13.90 ± 1.31                   | <b>55.00 ± 7.66</b>       | 11.20 ± 1.43                  |
| LIBERO-Object  |                              |                            |                                |                           |                               |
| ACT-LoRA       | 67.00 ± 2.20                 | 68.00 ± 8.57*              | 67.20 ± 1.50*                  | 48.00 ± 10.23*            | 63.20 ± 1.60*                 |
| GMM-LoRA       | <b>77.75 ± 1.90</b>          | 15.00 ± 5.65               | 65.20 ± 2.15*                  | 14.00 ± 5.89              | 65.00 ± 1.08*                 |
| ACT            | 12.88 ± 2.78                 | 63.00 ± 9.33*              | 22.90 ± 2.45                   | 35.50 ± 7.92*             | 17.40 ± 3.45                  |
| LIBERO-Goal    |                              |                            |                                |                           |                               |
| ACT-LoRA       | 73.63 ± 2.96*                | <b>49.00 ± 8.54</b>        | <b>68.70 ± 3.70</b>            | 23.00 ± 8.57*             | 63.50 ± 4.00*                 |
| GMM-LoRA       | 75.38 ± 1.63*                | 10.50 ± 5.61               | 62.40 ± 1.39                   | 3.5 ± 2.92                | 61.00 ± 1.72*                 |
| ACT            | 0.00 ± 0.00                  | 19.50 ± 3.66               | 3.90 ± 0.73                    | 10.50 ± 4.57*             | 2.10 ± 0.91                   |

## References

- [1] Dai et al., 2024. Think, act, and ask: Open-world interactive personalized robot navigation
- [2] Liu et al., 2024. Tail: Task-specific adapters for imitation learning with large pre-trained models
- [3] Maeda et al. Active incremental learning of robot movement primitives
